# Supplementary material
Source: PubMed Central journal article supplement (PMC123185)
Supplement: supp_142675599_6755Table2.pdf [file supp_142675599_6755Table2.pdf]

Table 2. Baboon life table

| Age, years       | No. entering | No. dead | No. censored | Hazard, $\mu(x)$ | Median residual lifetime, $e(x)$ |
|------------------|--------------|----------|--------------|------------------|----------------------------------|
| Amboseli females |              |          |              |                  |                                  |
| 0                | 274          | 59       | 20           | 0.252            | 7.97                             |
| 1                | 195          | 22       | 9            | 0.122            | 10.46                            |
| 2                | 164          | 14       | 12           | 0.093            | 10.73                            |
| 3                | 138          | 4        | 2            | 0.030            | 11.28                            |
| 4                | 132          | 4        | 8            | 0.032            | 10.51                            |
| 5                | 120          | 7        | 6            | 0.062            | 9.75                             |
| 6                | 107          | 5        | 6            | 0.049            | 9.22                             |
| 7                | 96           | 5        | 2            | 0.054            | 8.62                             |
| 8                | 89           | 4        | 2            | 0.046            | 8.03                             |
| 9                | 83           | 5        | 4            | 0.064            | 7.42                             |
| 10               | 74           | 6        | 0            | 0.084            | 6.92                             |
| 11               | 68           | 8        | 2            | 0.127            | 6.25                             |
| 12               | 58           | 4        | 0            | 0.071            | 5.64                             |
| 13               | 54           | 2        | 2            | 0.038            | 4.83                             |
| 14               | 50           | 6        | 2            | 0.130            | 3.93                             |
| 15               | 42           | 5        | 0            | 0.126            | 3.29                             |
| 16               | 37           | 4        | 6            | 0.125            | 2.60                             |
| 17               | 27           | 7        | 5            | 0.333            | 1.87                             |
| 18               | 15           | 5        | 1            | 0.417            | 3.04                             |
| 19               | 9            | 2        | 0            | 0.250            | 2.83                             |
| 20               | 7            | 0        | 0            |                  | 2.50                             |
| 21               | 7            | 3        | 0            | 0.545            | 1.50                             |
| 22               | 4            | 1        | 0            | 0.286            | 2.00                             |
| 23               | 3            | 1        | 0            | 0.400            | 1.50                             |
| 24               | 2            | 1        | 0            | 0.667            | 1.00                             |
| 25               | 1            | 0        | 0            |                  |                                  |
| 26               | 1            | 0        | 1            |                  |                                  |
| Gombe females    |              |          |              |                  |                                  |
| 0                | 399          | 108      | 3            | 0.314            | 13.72                            |
| 1                | 288          | 23       | 12           | 0.085            | 16.60                            |
| 2                | 253          | 7        | 12           | 0.029            | 16.68                            |
| 3                | 234          | 6        | 12           | 0.027            | 6.17                             |
| 4                | 216          | 1        | 17           | 0.005            | 15.60                            |
| 5                | 198          | 2        | 10           | 0.010            | 14.67                            |
| 6                | 186          | 2        | 14           | 0.011            | 13.83                            |
| 7                | 170          | 5        | 14           | 0.031            | 13.00                            |
| 8                | 151          | 2        | 10           | 0.014            | 11.64                            |
| 9                | 139          | 2        | 8            | 0.015            | 10.85                            |
| 10               | 129          | 2        | 10           | 0.016            | 10.03                            |

|    |     |   |   |       |      |
|----|-----|---|---|-------|------|
| 11 | 117 | 4 | 5 | 0.036 | 9.27 |
| 12 | 108 | 5 | 9 | 0.050 | 8.58 |
| 13 | 94  | 6 | 3 | 0.067 | 7.98 |
| 14 | 85  | 6 | 5 | 0.075 | 8.09 |
| 15 | 74  | 3 | 9 | 0.044 | 7.24 |
| 16 | 62  | 6 | 9 | 0.110 | 6.58 |
| 17 | 47  | 5 | 3 | 0.116 | 5.90 |
| 18 | 39  | 2 | 3 | 0.055 | 5.22 |
| 19 | 34  | 2 | 3 | 0.063 | 5.03 |
| 20 | 29  | 2 | 0 | 0.071 | 4.44 |
| 21 | 27  | 4 | 0 | 0.160 | 4.06 |
| 22 | 23  | 1 | 1 | 0.045 | 3.11 |
| 23 | 21  | 6 | 0 | 0.333 | 2.39 |
| 24 | 15  | 1 | 2 | 0.074 | 1.44 |
| 25 | 12  | 2 | 0 | 0.182 | 0.56 |
| 26 | 10  | 9 | 0 | 1.636 |      |
| 27 | 1   | 1 | 0 |       |      |

Southwest Foundation females \*

|    |      |     |     |       |       |
|----|------|-----|-----|-------|-------|
| 0  | 3801 | 944 | 167 | 0.291 | 13.02 |
| 1  | 2690 | 135 | 207 | 0.054 | 18.15 |
| 2  | 2348 | 74  | 205 | 0.034 | 18.01 |
| 3  | 2069 | 58  | 155 | 0.030 | 17.50 |
| 4  | 1856 | 37  | 110 | 0.021 | 16.92 |
| 5  | 1709 | 41  | 104 | 0.025 | 16.25 |
| 6  | 1564 | 49  | 152 | 0.033 | 15.68 |
| 7  | 1363 | 41  | 72  | 0.031 | 15.08 |
| 8  | 1250 | 28  | 76  | 0.023 | 14.25 |
| 9  | 1146 | 48  | 94  | 0.045 | 13.37 |
| 10 | 1004 | 33  | 120 | 0.036 | 12.60 |
| 11 | 851  | 28  | 124 | 0.036 | 11.78 |
| 12 | 699  | 21  | 83  | 0.032 | 10.95 |
| 13 | 595  | 17  | 60  | 0.031 | 10.32 |
| 14 | 518  | 13  | 74  | 0.027 | 9.75  |
| 15 | 431  | 17  | 50  | 0.043 |       |
| 16 | 364  | 20  | 27  | 0.059 |       |
| 17 | 317  | 17  | 16  | 0.057 |       |
| 18 | 284  | 17  | 55  | 0.069 |       |
| 19 | 212  | 11  | 54  | 0.061 |       |
| 20 | 147  | 8   | 58  | 0.070 |       |
| 21 | 81   | 4   | 24  | 0.060 |       |
| 22 | 53   | 7   | 27  | 0.194 |       |
| 23 | 19   | 1   | 9   | 0.071 |       |
| 24 | 9    | 0   | 6   |       |       |
| 25 | 3    | 0   | 2   |       |       |
| 26 | 1    | 0   | 0   |       |       |

|    |   |   |   |
|----|---|---|---|
| 27 | 1 | 1 | 0 |
| 28 | 1 | 1 | 0 |

Southwest Foundation males †

|    |      |     |     |       |       |
|----|------|-----|-----|-------|-------|
| 0  | 2559 | 809 | 130 | 0.387 | 7.11  |
| 1  | 1620 | 112 | 204 | 0.077 | 13.01 |
| 2  | 1304 | 57  | 183 | 0.048 | 14.05 |
| 3  | 1064 | 44  | 143 | 0.045 | 13.50 |
| 4  | 877  | 29  | 111 | 0.036 | 12.90 |
| 5  | 737  | 32  | 73  | 0.047 | 12.19 |
| 6  | 632  | 25  | 67  | 0.042 | 11.55 |
| 7  | 540  | 26  | 47  | 0.051 | 10.87 |
| 8  | 467  | 22  | 19  | 0.049 | 10.53 |
| 9  | 426  | 18  | 25  | 0.044 | 10.10 |
| 10 | 383  | 16  | 28  | 0.044 | 9.31  |
| 11 | 339  | 23  | 35  | 0.074 | 8.51  |
| 12 | 281  | 12  | 37  | 0.047 | 7.83  |
| 13 | 232  | 18  | 29  | 0.086 | 7.04  |
| 14 | 185  | 6   | 25  | 0.035 | 6.62  |
| 15 | 154  | 5   | 25  | 0.036 | 5.84  |
| 16 | 124  | 12  | 19  | 0.111 | 5.03  |
| 17 | 93   | 11  | 9   | 0.132 | 4.31  |
| 18 | 73   | 4   | 14  | 0.063 | 3.60  |
| 19 | 55   | 10  | 10  | 0.222 | 2.73  |
| 20 | 35   | 4   | 14  | 0.154 | 2.33  |
| 21 | 17   | 5   | 7   | 0.454 | 1.93  |
| 22 | 5    | 1   | 1   | 0.250 |       |
| 23 | 3    | 1   | 0   | 0.400 |       |
| 24 | 2    | 0   | 0   |       |       |
| 25 | 2    | 0   | 0   |       |       |
| 26 | 2    | 0   | 1   |       |       |
| 27 | 1    | 1   | 0   |       |       |

\* Residual lifetime cannot be calculated by the actuarial method for data here after 15 years old.

† Residual lifetime cannot be calculated by the actuarial method for data here after 22 years old.
